# Supplementary material for: Dizziness and Convergence Insufficiency in Children: Screening and Management
Source: PubMed Central journal article supplement (PMC6636600; doi:10.3389/fnint.2019.00025), 2019-07-10
Supplement: Table_1.pdf [file Table_1.pdf]

| <b>Orthoptic examination parameters</b>     | <b>Controls</b> | <b>Patients M0</b> | <b>Patients M3</b> | <b>Patients M9</b> |
|---------------------------------------------|-----------------|--------------------|--------------------|--------------------|
| NPC (cm)                                    | 2.0 (0.2)       | 5.8 (0.4)          | 2.5 (0.3)          | 2.5 (0.3)          |
| Far convergence amplitude (prism diopters)  | 18.9 (0.6)      | 14 (1)             | 34 (1.5)           | 29.2 (1.4)         |
| Near convergence amplitude (prism diopters) | 37.3 (0.8)      | 27 (1.6)           | 41.5 (0.9)         | 38.3 (1.1)         |
| Far divergence amplitude (prism diopters)   | 4.9 (0.2)       | 4.5 (0.2)          | 5.1 (0.2)          | 5.1 (0.3)          |
| Near divergence amplitude (prism diopters)  | 16.6 (0.3)      | 15.2 (0.5)         | 16.1 (0.4)         | 15.7 (0.4)         |

**Table 1**  
**ORTE**
