# Supplementary material for: Dizziness and Convergence Insufficiency in Children: Screening and Management
Source: PubMed Central journal article supplement (PMC6636600; doi:10.3389/fnint.2019.00025), 2019-07-10
Supplement: Table_2.pdf [file Table_2.pdf]

| <i>Orthoptic examination parameters</i>            | <b>M0 : patients vs controls</b>         |                | <b>M3 : patients vs controls</b>        |                 | <b>M9 : patients vs controls</b>       |                |
|----------------------------------------------------|------------------------------------------|----------------|-----------------------------------------|-----------------|----------------------------------------|----------------|
| <b>NPC (cm)</b>                                    | <b>3.68 [2.69 ; 4.66]<br/>p&lt;.0001</b> | <b>F=79.25</b> | <b>0.42 [-0.38 ; 1.22]<br/>p=0.48</b>   | <b>F=1.39</b>   | <b>0.38 [-0.34 ; 1.11]<br/>p=0.3</b>   | <b>F=1.08</b>  |
| <b>Far convergence amplitude (prism diopters)</b>  | <b>-4.60 [-6.94 ; -2.25] p=0.0002</b>    | <b>F=14.77</b> | <b>15.04 [11.63 ; 18.44] p&lt;.0001</b> | <b>F=111.84</b> | <b>10.18 [7.05 ; 13.32] p&lt;.0001</b> | <b>F=52.96</b> |
| <b>Near convergence amplitude (prism diopters)</b> | <b>-9.43 [-13.24 ; -5.63] p&lt;.0001</b> | <b>F=35.29</b> | <b>5.10 [2.16 ; 8.04] p=0.0003</b>      | <b>F=15.08</b>  | <b>1.76 [-1.00 ; 4.52] p=0.21</b>      | <b>F=1.57</b>  |
| <b>Far divergence amplitude (prism diopters)</b>   | <b>-0.42 [-1.20 ; 0.37] p=0.62</b>       | <b>F=1.62</b>  | <b>0.14 [-0.51 ; 0.79] p=0.68</b>       | <b>F=0.17</b>   | <b>0.18 [-0.64 ; 0.99] p=1.00</b>      | <b>F=0.24</b>  |
| <b>Near divergence amplitude (prism diopters)</b>  | <b>-0.90 [-2.24 ; 0.44] p=0.33</b>       | <b>F=2.61</b>  | <b>-0.03 [-1.07 ; 1.02] p=0.96</b>      | <b>F=0.00</b>   | <b>-0.32 [-1.54 ; 0.90] p=1</b>        | <b>F=0.34</b>  |

**Table 2**  
**ORTE**
