# Supplementary material for: Dizziness and Convergence Insufficiency in Children: Screening and Management
Source: PubMed Central journal article supplement (PMC6636600; doi:10.3389/fnint.2019.00025), 2019-07-10
Supplement: Table_3.pdf [file Table_3.pdf]

| <i>Orthoptic examination parameters</i>            | <b>M3 vs M0</b>              |                   | <b>M9 vs M0</b>              |                   | <b>M9 vs M3</b>              |                |
|----------------------------------------------------|------------------------------|-------------------|------------------------------|-------------------|------------------------------|----------------|
| <b>NPC (cm)</b>                                    | <b>-3.26 [-4.15 ; -2.37]</b> | <b>p&lt;.0001</b> | <b>-3.23 [-4.16 ; -2.30]</b> | <b>p&lt;.0001</b> | <b>0.03 [-0.57 ; 0.63]</b>   | <b>p=0.92</b>  |
| <b>far convergence amplitude (prism diopters)</b>  | <b>20.04 [15.82 ; 24.26]</b> | <b>p&lt;.0001</b> | <b>15.18 [11.59 ; 18.77]</b> | <b>p&lt;.0001</b> | <b>-4.86 [-7.96 ; -1.76]</b> | <b>p=0.004</b> |
| <b>Near convergence amplitude (prism diopters)</b> | <b>14.54 [10.39 ; 18.68]</b> | <b>p&lt;.0001</b> | <b>11.19 [7.23 ; 15.15]</b>  | <b>p&lt;.0001</b> | <b>-3.34 [-5.11 ; -1.57]</b> | <b>p=0.001</b> |
| <b>far divergence amplitude (prism diopters)</b>   | <b>0.64 [0.01 ; 1.26]</b>    | <b>p=0.06</b>     | <b>0.62 [-0.02 ; 1.26]</b>   | <b>p=0.07</b>     | <b>-0.02 [-0.48 ; 0.44]</b>  | <b>p=0.94</b>  |
| <b>Near divergence amplitude (prism diopters)</b>  | <b>0.92 [-0.13 ; 1.97]</b>   | <b>p=0.12</b>     | <b>0.53 [-0.68 ; 1.74]</b>   | <b>p=0.67</b>     | <b>-0.39 [-1.25 ; 0.46]</b>  | <b>p=0.37</b>  |

**Table 3**  
**ORTE**
