# Supplementary material for: Dizziness and Convergence Insufficiency in Children: Screening and Management
Source: PubMed Central journal article supplement (PMC6636600; doi:10.3389/fnint.2019.00025), 2019-07-10
Supplement: Table_4.pdf [file Table_4.pdf]

| Types of eye movement                                | Parameters       | Controls      | Patients M0    | Patients M3   | Patients M9   |
|------------------------------------------------------|------------------|---------------|----------------|---------------|---------------|
| Far saccade                                          | Gain             | 0.91 (0.01)   | 0.81 (0.01)    | 0.92 (0.01)   | 0.94 (0.01)   |
|                                                      | Latency (ms)     | 262.38 (5.20) | 267.78 (6.07)  | 233.39 (4.99) | 227.31 (4.77) |
|                                                      | Velocity (°/sec) | 227.76 (4.76) | 172.29 (7.04)  | 178.10 (6.54) | 172.78 (6.49) |
| Near saccade                                         | Gain             | 0.89 (0.01)   | 0.67 (0.02)    | 0.83 (0.02)   | 0.88 (0.02)   |
|                                                      | Latency (ms)     | 269.24 (5.16) | 260.56 (6.62)  | 226.17 (5.11) | 216.67 (4.82) |
|                                                      | Velocity (°/sec) | 222.86 (6.13) | 146.54 (7.22)  | 151.16 (6.91) | 148.32 (6.31) |
| Convergence                                          | Gain             | 0.90 (0.01)   | 0.65 (0.02)    | 0.89 (0.02)   | 0.89 (0.01)   |
|                                                      | Latency (ms)     | 261.87 (4.58) | 337.92 (10.10) | 251.79 (5.93) | 251.62 (9.85) |
|                                                      | Velocity (°/sec) | 18.04 (0.34)  | 15.86 (1.28)   | 21.00 (1.11)  | 20.47 (1.06)  |
| Divergence                                           | Gain             | 0.92 (0.01)   | 0.67 (0.02)    | 0.90 (0.02)   | 0.91 (0.01)   |
|                                                      | Latency (ms)     | 272.98 (4.94) | 297.80 (10.24) | 256.49 (7.55) | 240.17 (7.28) |
|                                                      | Velocity (°/sec) | 19.14 (0.38)  | 14.81 (0.91)   | 19.59 (0.94)  | 18.97 (0.82)  |
| Saccadic component of combined saccade+convergence   | Gain             | 0.88 (0.01)   | 0.61 (0.02)    | 0.83 (0.02)   | 0.86 (0.02)   |
|                                                      | Latency (ms)     | 293.42 (5.59) | 338.80 (8.00)  | 298.93 (6.95) | 300.12 (8.64) |
|                                                      | Velocity (°/sec) | 182.85 (6.29) | 121.27 (3.28)  | 124.12 (3.17) | 120.08 (3.60) |
| Saccadic component of combined saccade+divergence    | Gain             | 0.89 (0.01)   | 0.73 (0.02)    | 0.90 (0.01)   | 0.91 (0.01)   |
|                                                      | Latency (ms)     | 288.42 (4.79) | 337.92 (10.10) | 287.32 (8.92) | 286.29 (9.18) |
|                                                      | Velocity (°/sec) | 215.80 (5.50) | 131.62 (4.79)  | 140.06 (4.77) | 141.25 (5.49) |
| Convergent component of combined saccade+convergence | Gain             | 0.92 (0.01)   | 0.69 (0.02)    | 0.88 (0.01)   | 0.91 (0.01)   |
|                                                      | Latency (ms)     | 277.69 (5.57) | 317.99 (6.89)  | 276.29 (7.00) | 282.32 (8.70) |
|                                                      | Velocity (°/sec) | 22.62 (0.83)  | 21.04 (1.25)   | 23.08 (1.05)  | 24.04 (1.36)  |
| Divergent component of combined saccade+divergence   | Gain             | 0.92 (0.01)   | 0.69 (0.01)    | 0.93 (0.01)   | 0.93 (0.01)   |
|                                                      | Latency (ms)     | 286.17 (5.74) | 317.18 (8.21)  | 278.46 (6.98) | 266.00 (7.55) |
|                                                      | Velocity (°/sec) | 22.69 (0.57)  | 19.87 (0.97)   | 24.98 (1.47)  | 26.25 (1.71)  |

**Table 4**  
**OCME**
