# Supplementary material for: Dizziness and Convergence Insufficiency in Children: Screening and Management
Source: PubMed Central journal article supplement (PMC6636600; doi:10.3389/fnint.2019.00025), 2019-07-10
Supplement: Table_5.pdf [file Table_5.pdf]

| Eye movement type                                    | Parameters       | M0 : patients vs controls            |          | M3 : patients vs controls           |         | M9 : patients vs controls           |         |
|------------------------------------------------------|------------------|--------------------------------------|----------|-------------------------------------|---------|-------------------------------------|---------|
| Far saccade                                          | Gain             | -0.11 [-0.13 ; -0.08]<br>p<.0001     | F=138.12 | 0.01 [-0.01 ; 0.02]<br>p=0.3        | F=1.08  | 0.03 [0.01 ; 0.05]<br>p=0.002       | F=10.59 |
|                                                      | Latency (ms)     | 21.92 [6.98 ; 36.87]<br>p=0.002      | F=12.34  | -12.85 [-24.90 ; -0.79]<br>p=0.04   | F=4.36  | -16.81 [-31.17 ; -2.45]<br>p=0.02   | F=6.89  |
|                                                      | Velocity (°/sec) | -54.35 [-72.30 ; -36.40]<br>p<.0001  | F=52.54  | -47.13 [-61.71 ; -32.56]<br>p<.0001 | F=40.18 | -52.85 [-70.03 ; -35.66]<br>p<.0001 | F=47.51 |
| Near saccade                                         | Gain             | -0.23 [-0.26 ; -0.20]<br>p<.0001     | F=322.95 | -0.07 [-0.09 ; -0.04]<br>p<.0001    | F=30.26 | -0.02 [-0.04 ; 0.00]<br>p=0.1       | F=2.66  |
|                                                      | Latency (ms)     | 7.98 [-4.50 ; 20.45]<br>p=0.21       | F=1.57   | -26.81 [-40.85 ; -12.77]<br>p<.0001 | F=18.32 | -34.17 [-49.62 ; -18.72]<br>p<.0001 | F=28.03 |
|                                                      | Velocity (°/sec) | -71.62 [-94.07 ; -49.16]<br>p<.0001  | F=58.28  | -65.91 [-84.16 ; -47.66]<br>p<.0001 | F=50.1  | -68.23 [-89.63 ; -46.82]<br>p<.0001 | F=51.06 |
| Convergence                                          | Gain             | -0.27 [-0.31 ; -0.23]<br>p<.0001     | F=262.72 | -0.03 [-0.07 ; 0.00]<br>p=0.10      | F=3.82  | -0.03 [-0.05 ; 0.00]<br>p=0.09      | F=2.81  |
|                                                      | Latency (ms)     | 36.69 [22.65 ; 50.72]<br>p<.0001     | F=39.15  | 4.56 [-6.81 ; 15.94]<br>p=0.43      | F=0.62  | 7.41 [-7.33 ; 22.15]<br>p=0.52      | F=1.27  |
|                                                      | Velocity (°/sec) | -2.25 [-3.66 ; -0.83]<br>p=0.002     | F=9.66   | 2.83 [1.22 ; 4.45]<br>p<.0001       | F=17.64 | 2.28 [0.78 ; 3.77]<br>p=0.001       | F=11.57 |
| Divergence                                           | Gain             | -0.27 [-0.31 ; -0.23]<br>p<.0001     | F=302.79 | -0.03 [-0.06 ; -0.00]<br>p=0.05     | F=4.00  | -0.03 [-0.06 ; 0.00]<br>p=0.06      | F=4.62  |
|                                                      | Latency (ms)     | 40.59 [24.06 ; 57.13]<br>p<.0001     | F=34.53  | -1.05 [-13.64 ; 11.54]<br>p=0.87    | F=0.03  | -15.90 [-30.81 ; -0.99]<br>p=0.03   | F=5.71  |
|                                                      | Velocity (°/sec) | -4.31 [-5.92 ; -2.70]<br>p<.0001     | F=40.99  | 0.57 [-0.95 ; 2.09]<br>p=0.81       | F=0.70  | -0.19 [-1.49 ; 1.11]<br>p=0.78      | F=0.08  |
| Saccadic component of combined saccade+convergence   | Gain             | -0.28 [-0.31 ; -0.25]<br>p<.0001     | F=530.21 | -0.06 [-0.09 ; -0.03]<br>p<.0001    | F=25.47 | -0.03 [-0.06 ; -0.01]<br>p=0.009    | F=6.96  |
|                                                      | Latency (ms)     | 62.00 [44.42 ; 79.58]<br>p<.0001     | F=71.29  | 21.86 [7.64 ; 36.08]<br>p=0.003     | F=9.08  | 25.91 [8.65 ; 43.16]<br>p=0.002     | F=11.32 |
|                                                      | Velocity (°/sec) | -64.45 [-86.73 ; -42.17]<br>p<.0001  | F=47.97  | -61.76 [-79.97 ; -43.55]<br>p<.0001 | F=44.18 | -66.35 [-87.96 ; -44.74]<br>p<.0001 | F=47.35 |
| Saccadic component of combined saccade+divergence    | Gain             | -0.17 [-0.20 ; -0.14]<br>p<.0001     | F=164.9  | 0.01 [-0.01 ; 0.04]<br>p=0.24       | F=1.36  | 0.02 [-0.00 ; 0.05]<br>p=0.13       | F=3.37  |
|                                                      | Latency (ms)     | 62.28 [45.80 ; 78.76]<br>p<.0001     | F=81.89  | 10.95 [-2.32 ; 24.23]<br>p=0.11     | F=2.61  | 11.41 [-4.24 ; 27.05]<br>p=0.21     | F=2.67  |
|                                                      | Velocity (°/sec) | -80.25 [-100.34 ; -60.15]<br>p<.0001 | F=91.36  | -71.07 [-89.61 ; -52.52]<br>p<.0001 | F=73.79 | -69.88 [-86.82 ; -52.94]<br>p<.0001 | F=65.36 |
| Convergent component of combined convergence+saccade | Gain             | -0.24 [-0.27 ; -0.20]<br>p<.0001     | F=258.69 | -0.04 [-0.07 ; -0.01]<br>p=0.008    | F=8.48  | -0.02 [-0.04 ; 0.01]<br>p=0.27      | F=1.24  |
|                                                      | Latency (ms)     | 55.21 [37.47 ; 72.95]<br>p<.0001     | F=55.51  | 12.87 [-1.95 ; 27.69]<br>p=0.09     | F=2.9   | 21.28 [3.26 ; 39.30]<br>p=0.02      | F=7.00  |
|                                                      | Velocity (°/sec) | -0.90 [-3.48 ; 1.68]<br>p=0.5        | F=0.46   | 1.23 [-1.65 ; 4.11]<br>p=0.68       | F=0.92  | 2.47 [-0.79 ; 5.72]<br>p=0.21       | F=3.3   |
| Divergent component of combined divergence+saccade   | Gain             | -0.23 [-0.26 ; -0.20]<br>p<.0001     | F=351.56 | 0.01 [-0.02 ; 0.03]<br>p=1.00       | F=0.34  | 0.00 [-0.02 ; 0.02]<br>p=0.86       | F=0.03  |
|                                                      | Latency (ms)     | 47.30 [29.32 ; 65.27]<br>p<.0001     | F=39.7   | 8.18 [-8.43 ; 24.78]<br>p=0.54      | F=1.22  | -1.90 [-17.00 ; 13.20]<br>p=0.81    | F=0.06  |
|                                                      | Velocity (°/sec) | -2.66 [-4.73 ; -0.58]<br>p=0.009     | F=8.26   | 2.60 [0.59 ; 4.60]<br>p=0.01        | F=6.44  | 3.95 [1.33 ; 6.57]<br>p=0.001       | F=13.03 |

**Table 5**  
**OCME**
