# Supplementary material for: Dizziness and Convergence Insufficiency in Children: Screening and Management
Source: PubMed Central journal article supplement (PMC6636600; doi:10.3389/fnint.2019.00025), 2019-07-10
Supplement: Table_6.pdf [file Table_6.pdf]

| Eye movement type                                    | Parameters       | M3 vs M0                 |          | M9 vs M0                 |          | M9 vs M3                |          |
|------------------------------------------------------|------------------|--------------------------|----------|--------------------------|----------|-------------------------|----------|
| Far saccade                                          | Gain             | 0.11 [0.08 ; 0.14]       | p<0.0001 | 0.13 [0.09 ; 0.17]       | p<0.0001 | 0.02 [0.01 ; 0.03]      | p=0.0004 |
|                                                      | Latency (ms)     | -34.39 [-44.83 ; -23.96] | p<0.0001 | -39.38 [-50.71 ; -28.05] | p<0.0001 | -4.99 [-13.13 ; 3.15]   | p=0.24   |
|                                                      | Velocity (°/sec) | 5.80 [-12.79 ; 24.40]    | p=0.99   | 3.04 [-13.39 ; 19.48]    | p=0.72   | -2.76 [-9.72 ; 4.19]    | p>.99    |
| Near saccade                                         | Gain             | 0.16 [0.11 ; 0.21]       | p<0.0001 | 0.20 [0.15 ; 0.25]       | p<0.0001 | 0.04 [0.02 ; 0.06]      | p=0.0004 |
|                                                      | Latency (ms)     | 34.39 [-47.69 ; -21.08]  | p<0.0001 | -44.15 [-59.94 ; -28.35] | p<0.0001 | -9.76 [-16.68 ; -2.84]  | p=0.01   |
|                                                      | Velocity (°/sec) | 4.61 [-10.57 ; 19.80]    | p=0.99   | 1.53 [-9.54 ; 12.60]     | p=0.79   | -3.09 [-10.22 ; 4.05]   | p=0.92   |
| Convergence                                          | Gain             | 0.24 [0.18 ; 0.29]       | p<0.0001 | 0.25 [0.19 ; 0.30]       | p<0.0001 | 0.01 [-0.01 ; 0.03]     | p=0.39   |
|                                                      | Latency (ms)     | -31.87 [-39.17 ; -24.56] | p<0.0001 | -32.72 [-51.88 ; -13.56] | p=0.001  | -0.86 [-15.75 ; 14.04]  | p=0.91   |
|                                                      | Velocity (°/sec) | 5.23 [2.61 ; 7.85]       | p<0.0001 | 4.81 [2.22 ; 7.40]       | p=0.0003 | -0.41 [-1.65 ; 0.82]    | p=0.51   |
| Divergence                                           | Gain             | 0.23 [0.17 ; 0.30]       | p<0.0001 | 0.24 [0.19 ; 0.29]       | p<0.0001 | 0.01 [-0.02 ; 0.04]     | p=0.61   |
|                                                      | Latency (ms)     | 41.31 [-53.58 ; -29.03]  | p<0.0001 | -58.10 [-75.47 ; -40.73] | p<0.0001 | -16.79 [-27.79 ; -5.79] | p=0.004  |
|                                                      | Velocity (°/sec) | 4.77 [2.79 ; 6.76]       | p<0.0001 | 4.19 [2.25 ; 6.14]       | p<0.0001 | -0.58 [-2.11 ; 0.95]    | p=0.46   |
| Saccadic component of combined saccade+convergence   | Gain             | 0.22 [0.18 ; 0.27]       | p<0.0001 | 0.25 [0.20 ; 0.30]       | p<0.0001 | 0.03 [0.01 ; 0.04]      | p=0.01   |
|                                                      | Latency (ms)     | -39.87 [-54.22 ; -25.52] | p<0.0001 | -39.56 [-60.21 ; -18.91] | p<0.0001 | 0.31 [-13.35 ; 13.97]   | p=0.99   |
|                                                      | Velocity (°/sec) | 2.86 [-3.53 ; 9.24]      | p=0.64   | -0.27 [-6.88 ; 6.34]     | p=0.94   | -3.12 [-8.58 ; 2.33]    | p=0.53   |
| Saccadic component of combined saccade+divergence    | Gain             | 0.18 [0.13 ; 0.22]       | p<0.0001 | 0.19 [0.15 ; 0.23]       | p<0.0001 | 0.01 [-0.01 ; 0.03]     | p=0.3    |
|                                                      | Latency (ms)     | -50.60 [-66.83 ; -34.37] | p<0.0001 | -54.73 [-74.12 ; -35.35] | p<0.0001 | -4.13 [-11.43 ; 3.17]   | p=0.27   |
|                                                      | Velocity (°/sec) | 6.97 [-2.35 ; 16.29]     | p=0.2    | 11.37 [-1.62 ; 24.36]    | p=0.12   | 4.40 [-4.58 ; 13.38]    | p=0.34   |
| Convergent component of combined saccade+convergence | Gain             | 0.20 [0.16 ; 0.24]       | p<0.0001 | 0.22 [0.18 ; 0.27]       | p<0.0001 | 0.03 [0.01 ; 0.04]      | p<0.0001 |
|                                                      | Latency (ms)     | -41.70 [-53.07 ; -30.33] | p<0.0001 | -35.76 [-55.90 ; -15.62] | p=0.001  | 5.95 [-9.46 ; 21.35]    | p=0.45   |
|                                                      | Velocity (°/sec) | 2.04 [0.11 ; 3.97]       | p=0.04   | 3.18 [0.25 ; 6.10]       | p=0.04   | 1.13 [-0.78 ; 3.05]     | p=0.25   |
| Divergent component of combined saccade+divergence   | Gain             | 0.24 [0.19 ; 0.28]       | p<0.0001 | 0.23 [0.19 ; 0.28]       | p<0.0001 | -0.00 [-0.02 ; 0.01]    | p=0.79   |
|                                                      | Latency (ms)     | -38.72 [-51.70 ; -25.74] | p<0.0001 | -50.25 [-65.38 ; -35.12] | p<0.0001 | -11.52 [-20.11 ; -2.94] | p=0.01   |
|                                                      | Velocity (°/sec) | 5.11 [2.30 ; 7.91]       | p=0.0004 | 6.36 [3.22 ; 9.51]       | p<0.0001 | 1.26 [-0.82 ; 3.33]     | p=0.24   |

**Table 6**  
**OCME**
